# Supplementary material for: Potentiation of Cisplatin Cytotoxicity in Resistant Ovarian Cancer SKOV3/Cisplatin Cells by Quercetin Pre-Treatment
Source: MDPI journal article supplement (doi:10.3390/ijms241310960), 2023-06-30
Supplement: s1 [file s1]

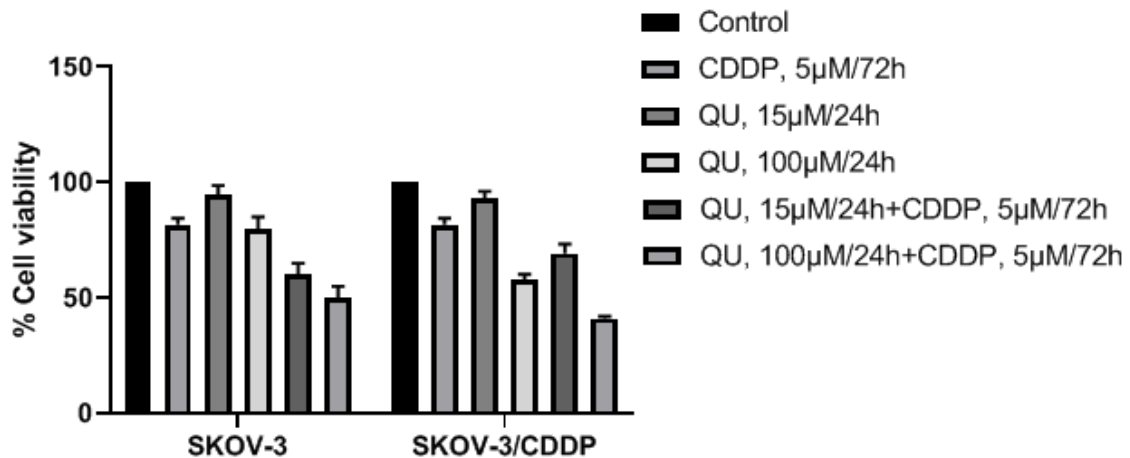

**Figure S1.** QU pre-treatment effect on the CDDP efficacy . The both types of cells were treated with low and high QU (15 or 100  $\mu$ M) doses for 24 h followed by fresh medium for 72 h or /and CDDP (5  $\mu$ M for SKOV-3 and 17  $\mu$ M for SKOV-3/CDDP) for 72 h. Cell viability was assessed using MTT assay. All data are presented as mean  $\pm$  SEM.

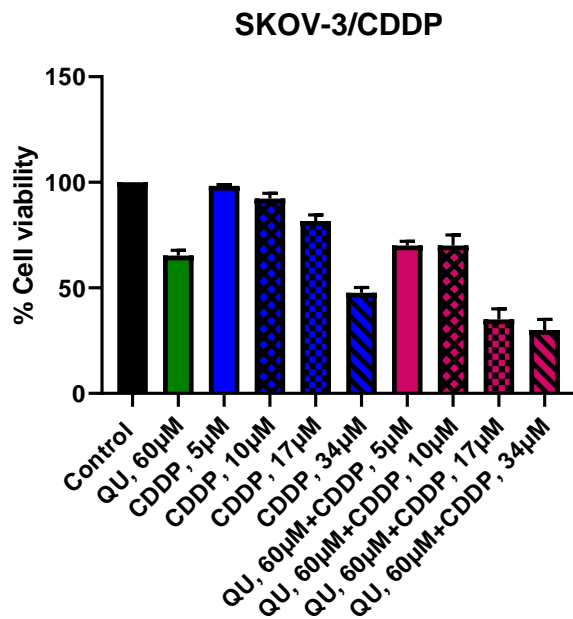

**Figure S2.** QU pre-treatment effect on the CDDP efficacy. The SKOV-3/CDDP cells were treated with QU (60  $\mu$ M) for 48 h followed by fresh medium for 72 h or /and CDDP (5,10,17 and 34  $\mu$ M) for 72 h. Cell viability was assessed using MTT assay.

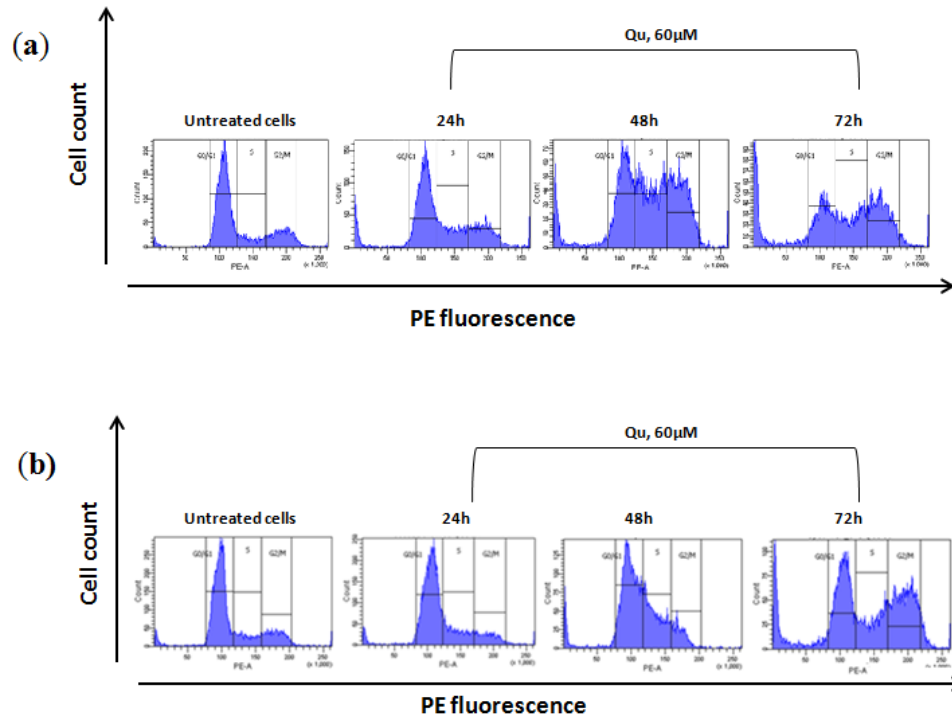

**Figure S3.** Representative cell cycle flow cytometry dot-plots of ovarian cancer (a) SKOV-3 and (b) SKOV-3/CDDP cells treated with (60  $\mu$ M) QU for 24, 48 and 72 h.

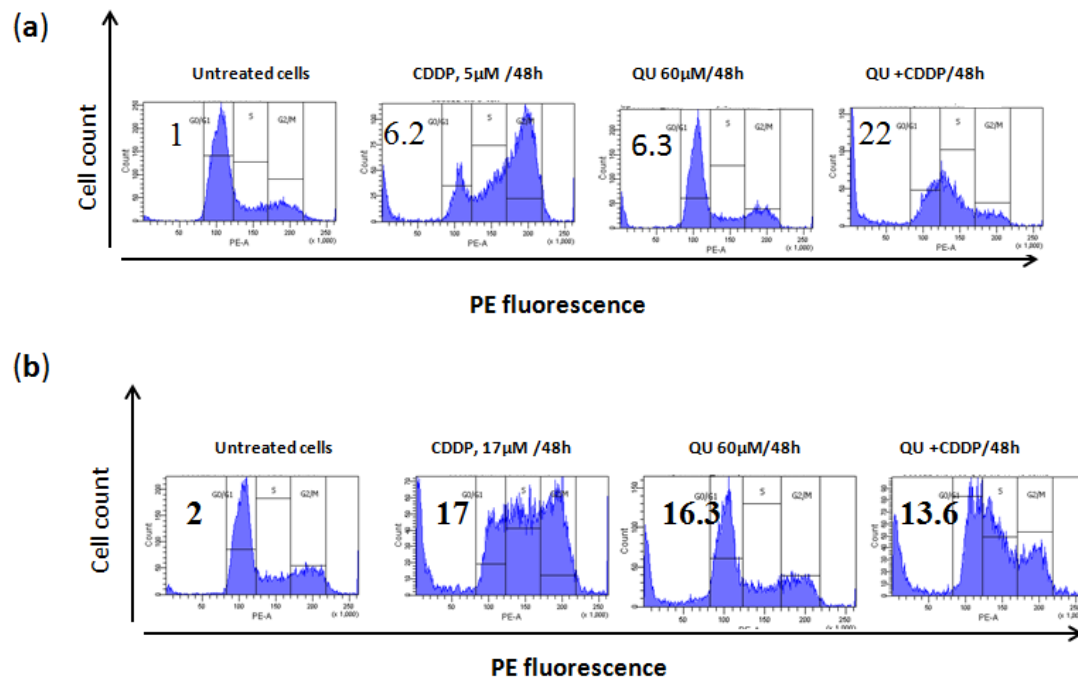

**Figure S4.** Representative cell cycle flow cytometry dot-plots of ovarian cancer (a) SKOV-3 and (b) SKOV-3/CDDP cells treated with (60  $\mu$ M) QU or CDDP only and a combination QU and CDDP treatment for 48h.
